# Supplementary material
Source: PubMed Central journal article supplement (PMC6551211)
Supplement: 10-1055-s-0039-1691840-s180230ra.pdf [file 10-1055-s-0039-1691840-s180230ra.pdf]

## Supplementary Material

Keywords used for e-prescribing incident identification algorithm in the Pharmacy Quality Commitment (PQC) database

The algorithm searched for the values: = 'e rx', 'e prescri', 'e script', 'electronic prescri', 'electronic order', 'cpoe', 'ep', 'computer prescri'

The search values listed in were:

e-Rx

erx

e-rx

e-prescribing

E prescribing

e prescribing

eprescribing

Electronic prescribing

electronic prescribing

Electronic order

electronic order

CPOE

electronic prescription

eprescription

e-prescription

EP (This one may be to generic)

eP (This one may be to generic)

Computer prescribing

Computer prescription

After running the query several times, we refined the search terms to reduce false positive hits and false negative hits. A "space" in the search value can represent any value. For example, "e-rx" in the description field would match to "e rx" in the search value list. We did this to find all search terms recommended. This also eliminated false positive hits, such as "The rx was filled on time".
